# Supplementary material for: Insights into Phylogenetic Relationships and Genome Evolution of Subfamily Commelinoideae (Commelinaceae Mirb.) Inferred from Complete Chloroplast Genomes
Source: Research Square preprint supplement (doi:10.21203/rs.3.rs-116972/v1), 2020-12-11
Supplement: Supplementary file 2 [file d67ad61e049a28e5a88d3edc.xlsx]

## Sheet: Supplementary Table S2
Supplementary Table S2. List of species used for phylogenomic analyses
Order	Family	Species
Commelinales	Commelinaceae	Gibasis geniculata
		Tradescantia virginiana
		Callisia repens
		Weldenia candida
		Amischotolype hispida
		Belosynapsis ciliata
		Cochliostema odoratissimum
		Geogenanthus poeppigii
		Dichorisandra thyrsiflora
		Siderasis fuscata
		Streptolirion volubile
		Palisota barteri
		Pollia japonica
		Rhopalephora scaberrima
		Commelina comunis
		Murdannia edulis
	Hanguanaceae	Hanguana malayana
	Haemodoraceae	Anigozanthos flavidus
		Xiphidium caeruleum
	Pontederiaceae	Eichhornia crassipes
		Pontederia cordata
	Philydraceae	Philydrum lanuginosum
Zingiberales	Zingiberaceae	Alpinia oxyphylla
		Zingiber officinale
	Musaceae	Musa balbisiana
Poales	Typhaceae	Sparganium stoloniferum
		Typha latifolia
Acorales	Arecaceae	Nypa fruticans
		Calamus caryotoides
Asparagales	Amaryllidaceae	Agapanthus coddii
	Xanthorrhoeaceae	Xanthorrhoea preissii
	Orchidaceae	Cypripedium japonicum
Liliales	Liliaceae	Lilium tsingtauense
	Smilacaceae	Smilax nipponica
	Colchicaceae	Colchicum autumnale
	Campynemataceae	Campynema lineare
Pandanales	Stemonaceae	Stemona japonica
Dioscoreales	Nartheciaceae	Aletris spicata
Petrosaviales	Petrosaviaceae	Japonolirion osense
Arecales	Tofieldiaceae	Tofieldia thibetica
	Araceae	Symplocarpus renifolius
Acorales	Acoraceae	Acorus calamus
