# Supplementary material for: Insights into Phylogenetic Relationships and Genome Evolution of Subfamily Commelinoideae (Commelinaceae Mirb.) Inferred from Complete Chloroplast Genomes
Source: Research Square preprint supplement (doi:10.21203/rs.3.rs-116972/v1), 2020-12-11
Supplement: Supplementary file 3 [file ead0adc065527c09ef808f4b.xlsx]

## Sheet: Sheet1
	Table S3. Nucleotide diversity (Pi) of 16 Commelinoideae species.
				Commelinaceae		Commelineae		Tradescantieae
	No.	gene	Selected region	Nucleotide diversity, Pi	Standard deviation of Pi	Nucleotide diversity, Pi	Standard deviation of Pi	Nucleotide diversity, Pi	Standard deviation of Pi
	1	psbA	1-1062	0.02804	0.00231	0.02448	0.00522	0.022	0.00413
	2	matK	1-1635	0.07594	0.00611	0.0658	0.01524	0.06421	0.00131
	3	rps16	1-252	0.03755	0.00303	0.0218	0.00679	0.03318	0.00312
	4	psbK	1-192	0.02836	0.00575	0.03763	0.01274	0.02379	0.0037
	5	psbI	1-111	0.04212	0.00485	0.02703	0.00986	0.03945	0.00314
	6	atpA	1-1524	0.0424	0.00462	0.04484	0.0109	0.03189	0.00275
	7	atpF	1-567	0.04152	0.00434	0.03243	0.00846	0.03159	0.0036
	8	atpH	1-246	0.03076	0.00473	0.03862	0.00958	0.01952	0.00621
	9	atpI	1-744	0.02912	0.00342	0.03427	0.00803	0.02126	0.00463
	10	rps2	1-714	0.0378	0.00428	0.03563	0.00913	0.02734	0.00468
	11	rpoC2	1-4239	0.04856	0.00523	0.05437	0.01245	0.03646	0.00304
	12	rpoC1	1-2097	0.03408	0.00301	0.03226	0.00749	0.02657	0.0048
	13	rpoB	1-3231	0.036	0.00353	0.036	0.00842	0.02831	0.0039
	14	petN	1-90	0.02139	0.00441	0.01111	0.00376	0.01835	0.00421
	15	psbM	1-105	0.0196	0.00465	0.03016	0.01059	0.01501	0.00524
	16	psbD	1-1062	0.02855	0.00262	0.0248	0.00545	0.02468	0.00416
	17	psbC	1-1422	0.02295	0.00237	0.02098	0.00534	0.01796	0.004
	18	psbZ	1-189	0.01261	0.00233	0.0194	0.00492	0.00834	0.0061
	19	rps14	1-303	0.03075	0.00433	0.022	0.0078	0.0267	0.00356
	20	psaB	1-2205	0.02653	0.00269	0.02547	0.00593	0.02106	0.00412
	21	psaA	1-2253	0.02523	0.0023	0.02419	0.00534	0.02045	0.00585
	22	ycf3	1-513	0.02214	0.00313	0.02632	0.00666	0.01562	0.00575
	23	rps4	1-606	0.02797	0.00363	0.033	0.00973	0.0209	0.00549
	24	ndhJ	1-480	0.03635	0.00449	0.03819	0.00907	0.02708	0.00244
	25	ndhK	1-729	0.03343	0.00341	0.03158	0.0083	0.0274	0.00357
	26	ndhC	1-363	0.03446	0.00354	0.03765	0.0079	0.02534	0.00583
	27	atpE	1-408	0.03476	0.00422	0.04074	0.00847	0.02713	0.00293
	28	atpB	1-1521	0.03549	0.00406	0.04208	0.0095	0.02744	0.00229
	29	rbcL	1-1449	0.0446	0.00321	0.037	0.00804	0.03933	0.00575
	30	psaI	1-111	0.04219	0.00559	0.04805	0.01192	0.03931	0.00293
	31	ycf4	1-555	0.04372	0.0048	0.04384	0.01037	0.03396	0.00341
	32	cemA	1-690	0.04403	0.00502	0.04381	0.01099	0.03568	0.00292
	33	petA	1-963	0.03925	0.00403	0.03825	0.00919	0.03243	0.00548
	34	psbJ	1-123	0.02602	0.00353	0.03252	0.00878	0.0186	0.00589
	35	psbL	1-117	0.00427	0.00163	0.00855	0.00289	0.00285	0.01123
	36	psbF	1-120	0.02271	0.0033	0.01806	0.00715	0.01995	0.00701
	37	psbE	1-252	0.02556	0.00388	0.03241	0.00888	0.01707	0.00569
	38	petL	1-96	0.04384	0.0064	0.04167	0.01125	0.02762	0.00435
	39	petG	1-114	0.02456	0.00352	0.01754	0.00474	0.01914	0.00485
	40	psaJ	1-135	0.04916	0.00523	0.03101	0.01001	0.04064	0.00371
	41	rpl33	1-201	0.04324	0.00559	0.03483	0.00854	0.03513	0.0027
	42	rps18	1-312	0.03946	0.00535	0.0463	0.01257	0.0256	0.00407
	43	rpl20	1-354	0.03298	0.00457	0.04661	0.01094	0.02281	0.00328
	44	rps12	1-369	0.00759	0.00122	0.00994	0.00297	0.00476	0.00659
	45	clpP	1-621	0.04261	0.00406	0.03749	0.0096	0.04053	0.00363
	46	psbB	1-1527	0.03435	0.00313	0.03242	0.00862	0.02579	0.00461
	47	psbT	1-108	0.02958	0.00485	0.04412	0.01338	0.02184	0.0029
	48	psbN	1-132	0.01168	0.00252	0.0202	0.00379	0.00861	0.00527
	49	psbH	1-222	0.03089	0.00431	0.03228	0.00787	0.02443	0.00348
	50	petB	1-654	0.02379	0.00236	0.02039	0.00447	0.0209	0.00523
	51	petD	1-483	0.02491	0.00317	0.0314	0.00905	0.01823	0.00479
	52	rps11	1-417	0.04267	0.00441	0.03477	0.00853	0.03583	0.00272
	53	rpl36	1-114	0.02924	0.00499	0.02778	0.00753	0.02911	0.00556
	54	infA	1-234	0.02731	0.00199	0.01852	0.00416	0.02622	0.00477
	55	rps8	1-405	0.04706	0.00459	0.03968	0.00938	0.03452	0.00298
	56	rpl14	1-369	0.03726	0.00467	0.0402	0.01007	0.02603	0.00393
	57	rpl16	1-408	0.04281	0.00396	0.0384	0.00983	0.03383	0.00259
	58	rps3	1-660	0.05254	0.00496	0.05122	0.01209	0.04348	0.00276
	59	rpl22	1-402	0.04581	0.00491	0.01499	0.00514	0.04655	0.00234
	60	rps19	1-279	0.00478	0.0011	0.00179	0.00095	0.00418	0.00568
	61	rpl2	1-834	0.00649	0.00094	0.006	0.00156	0.00545	0.00624
	62	rpl23	1-282	0.00466	0.00113	0.00177	0.00094	0.00359	0.00681
	63	ycf2	1-7074	0.01519	0.00197	0.01635	0.00396	0.01206	0.0061
	64	ndhB	1-1533	0.00641	0.00093	0.00609	0.00134	0.00454	0.0069
	65	rps7	1-468	0.00668	0.00085	0.00321	0.00117	0.00628	0.00682
	66	ndhF	1-2367	0.06284	0.00572	0.06451	0.01457	0.05033	0.00133
	67	rpl32	1-186	0.06174	0.00798	0.06992	0.01614	0.04785	0.00085
	68	ccsA	1-999	0.05788	0.00584	0.05645	0.01364	0.04873	0.00116
	69	ndhD	1-1509	0.05596	0.00529	0.05234	0.01404	0.04381	0.00116
	70	psaC	1-246	0.03743	0.00365	0.03862	0.00927	0.02876	0.00289
	71	ndhE	1-306	0.04167	0.00438	0.04031	0.00982	0.03407	0.002
	72	ndhG	1-531	0.05366	0.00557	0.0565	0.01244	0.04003	0.00158
	73	ndhI	1-543	0.02874	0.00064	0.03426	0.00817	0.02312	0.00428
	74	ndhA	1-1092	0.0493	0.0044	0.05418	0.01292	0.04021	0.0019
	75	ndhH	1-1182	0.04509	0.00434	0.04498	0.0099	0.03673	0.00276
	76	rps15	1-276	0.06022	0.00561	0.05678	0.01346	0.0482	0.00097
	77	ycf1	1-6294	0.09543	0.00929	0.09623	0.023	0.08239	0.00155
	78	trnK-UUU	1-72	0.00347	0.00202	0	0	0.00463	0.00252
	79	trnQ-UUG	1-72	0.02697	0.00575	0.01389	0.0047	0.008	0.00241
	80	trnS-GCU	1-90	0.01941	0.00456	0.01705	0.00904	0.01636	0.00487
	81	trnG-UCC	1-71	0.00176	0.0015	0	0	0.00235	0.00189
	82	trnR-UCU	1-72	0.01076	0.0033	0	0	0.00694	0.00402
	83	trnC-GCA	1-71	0.00986	0.00172	0	0	0.00854	0.00267
	84	trnD-GUC	1-74	0.00856	0.00204	0	0	0.0041	0.00199
	85	trnY-GUA	1-84	0.00873	0.00155	0	0	0.0101	0.00193
	86	trnE-UUC	1-73	0.00548	0.00156	0	0	0.00664	0.00145
	87	trnT-GGU	1-73	0.00868	0.00356	0	0	0.01157	0.00433
	88	trnS-UGA	1-93	0.01084	0.00289	0.01254	0.00392	0.00358	0.00195
	89	trnG-GCC	1-71	0.00176	0.0015	0.00704	0.00373	0	0
	90	trnfM-CAU	1-74	0.01047	0.0029	0.00676	0.00358	0.0045	0.00245
	91	trnS-GGA	1-87	0.01034	0.00324	0.01916	0.00694	0.00731	0.00242
	92	trnT-UGU	1-73	0	0	0	0	0	0
	93	trnL-UAA	1-85	0.01206	0.00566	0.02941	0.00838	0	0
	94	trnF-GAA	1-73	0.00491	0.00215	0.00685	0.00363	0.00457	0.00248
	95	trnV-UAC	1-76	0.00592	0.00203	0.00658	0.00349	0.00219	0.00177
	96	trnM-CAU	1-73	0.00342	0.00199	0.00685	0.00363	0.00228	0.00184
	97	trnW-CCA	1-74	0.00338	0.00197	0.01351	0.00457	0	0
	98	trnP-UGG	1-74	0.00338	0.00197	0	0	0.00225	0.00181
	99	trnH-GUG	1-74	0	0	0	0	0	0
	100	trnI-CAU	1-74	0.00169	0.00144	0	0	0.00225	0.00181
	101	trnL-CAA	1-81	0.00154	0.00131	0.00617	0.00327	0	0
	102	trnV-GAC	1-72	0	0	0	0	0	0
	103	trnI-GAU	1-77	0	0	0	0	0	0
	104	trnA-UGC	1-73	0.00719	0.00075	0	0	0.00726	0.00105
	105	trnR-ACG	1-74	0.00169	0.00144	0	0	0.00225	0.00181
	106	trnN-GUU	1-72	0.00324	0.00174	0.00926	0.00284	0	0
	107	trnL-UAG	1-80	0.00156	0.00133	0	0	0.00208	0.00168
	108	16S rRNA	1-1491	0.00112	0.00021	0.00067	0.00023	0.00121	0.00024
	109	23S rRNA	1-2812	0.00249	0.00039	0.0022	0.00072	0.00176	0.00034
	110	4.5S rRNA	1-103	0.00437	0.0015	0	0	0.00559	0.00168
	111	5S rRNA	1-121	0.00916	0.00237	0.00413	0.00219	0.00275	0.00222
