# Supplementary material for: Insights into Phylogenetic Relationships and Genome Evolution of Subfamily Commelinoideae (Commelinaceae Mirb.) Inferred from Complete Chloroplast Genomes
Source: Research Square preprint supplement (doi:10.21203/rs.3.rs-116972/v1), 2020-12-11
Supplement: Supplementary file 4 [file 1de70ac33c6b6e5aa94a283a.xlsx]

## Sheet: Supplementary Table S1
Supplementary Table S1. List of sampling taxa from 15 species of Commelinaceae and assembly information
Family	Species	Number of total read	Number of ptDNA reads	Coverage
Commelinaceae	Gibasis geniculata	13901918	152430	283.5
	Tradescantia virginiana	11685710	84375	153.5
	Callisia repens	10218532	233287	432.7
	Weldenia candida	11979416	274649	489.1
	Amischotolype hispida	9328712	40035	71.3
	Cochliostema odoratissimum	11415504	63466	114.8
	Geogenanthus poeppigii	11088694	70877	127.1
	Dichorisandra thyrsiflora	15296424	180814	324.9
	Siderasis fuscata	9468458	55295	96.7
	Streptolirion volubile	10062426	459535	794.3
	Palisota barteri	15235206	171495	309.4
	Pollia japonica	21685130	584925	1066.3
	Rhopalephora scaberrima	13241442	375988	701.1
	Commelina communis	12060000	278801	522
	Murdannia edulis	11687590	315180	549.9
